# Supplementary material for: Two New Species of Freshwater Planarian (Platyhelminthes, Tricladida, Dugesiidae, Dugesia) from Southern China Exhibit Unusual Karyotypes, with a Discussion on Reproduction in Aneuploid Species
Source: Hindawi journal article supplement (doi:10.1155/2024/8299436), 2024-02-22
Supplement: f1 [file 8299436.f1.pdf]

**Two new species of freshwater planarian (Platyhelminthes, Tricladida, DugesIIDae, *Dugesia*) from Southern China exhibit unusual karyotypes, with a discussion on reproduction in aneuploid species**

Lei Wang<sup>A</sup>, Shi-Qing Zhu<sup>A</sup>, Fu-Hao Ma<sup>A</sup>, Xiang-Jun Li<sup>A</sup>, Yu-Hao Zhao<sup>A</sup>,  
Xin-Xin Sun<sup>A</sup>, Ning Li<sup>A</sup>, Ronald Sluys<sup>B</sup>, De-Zeng Liu<sup>A</sup>, Zi-Mei Dong<sup>A\*</sup>,  
Guang-Wen Chen<sup>A\*</sup>

<sup>A</sup>*College of Life Science, Henan Normal University, Xixiang, 453007 Henan, China*

<sup>B</sup>*Naturalis Biodiversity Center, Leiden, The Netherlands*

\* Corresponding author: Guang-Wen Chen (chengw0183@sina.com), Zi-Mei Dong  
(dzmhix@163.com)

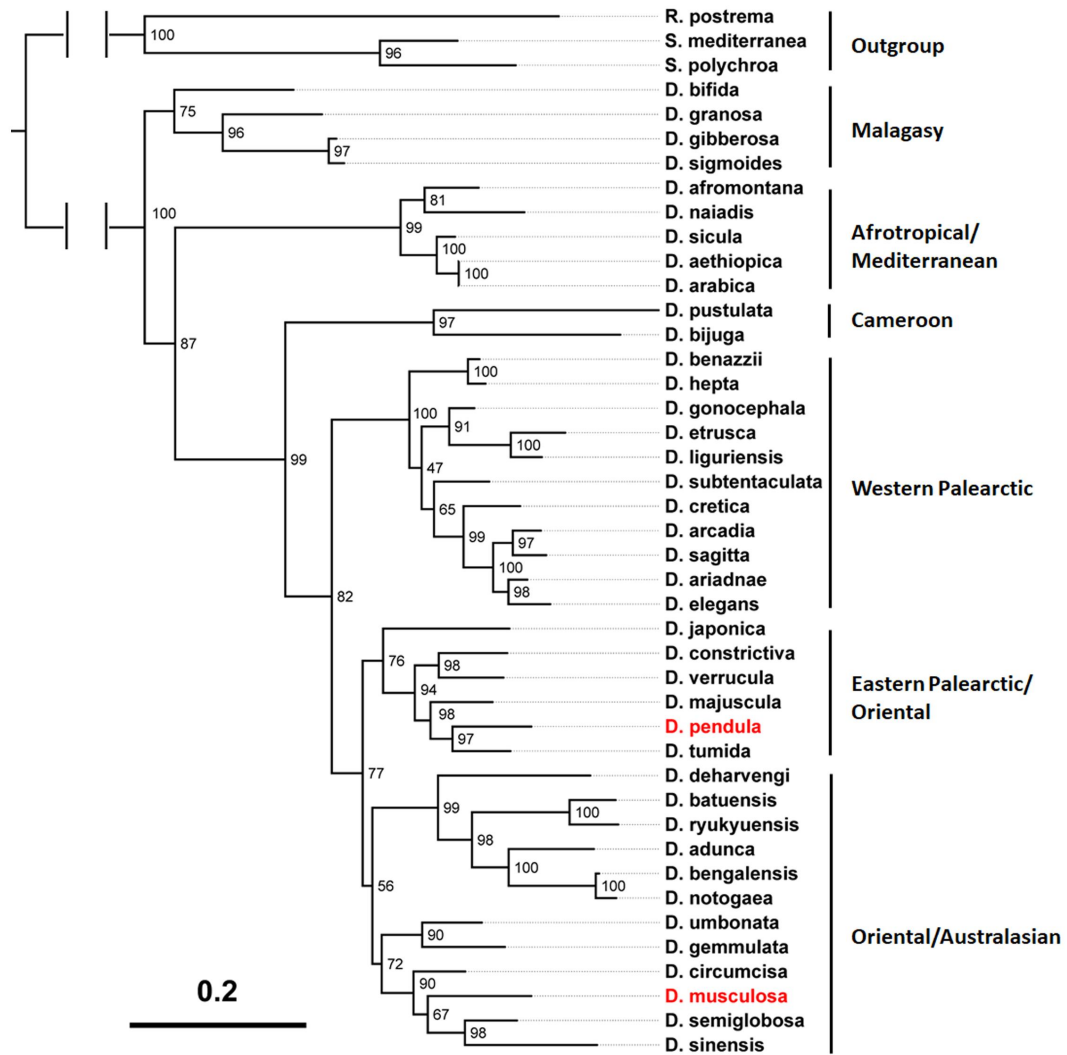

**Figure S1** Phylogenetic tree obtained from ML analysis of the concatenated dataset. Numbers at nodes indicate support values (bootstrap). The new species are indicated in red. Scale bar: Substitutions per site.
