# Supplementary material for: Two New Species of Freshwater Planarian (Platyhelminthes, Tricladida, Dugesiidae, Dugesia) from Southern China Exhibit Unusual Karyotypes, with a Discussion on Reproduction in Aneuploid Species
Source: Hindawi journal article supplement (doi:10.1155/2024/8299436), 2024-02-22
Supplement: f2 [file 8299436.f2.pdf]

# Two new species of freshwater planarian (Platyhelminthes, Tricladida, Dugesiidae, *Dugesia*) from Southern China exhibit unusual karyotypes, with a discussion on reproduction in aneuploid species

Lei Wang<sup>A</sup>, Shi-Qing Zhu<sup>A</sup>, Fu-Hao Ma<sup>A</sup>, Xiang-Jun Li<sup>A</sup>, Yu-Hao Zhao<sup>A</sup>, Xin-Xin Sun<sup>A</sup>, Ning Li<sup>A</sup>, Ronald Sluys<sup>B</sup>, De-Zeng Liu<sup>A</sup>, Zi-Mei Dong<sup>A\*</sup>, Guang-Wen Chen<sup>A\*</sup>

<sup>A</sup>College of Life Science, Henan Normal University, Xixiang, 453007 Henan, China

<sup>B</sup>Naturalis Biodiversity Center, Leiden, The Netherlands

\* Corresponding author: Guang-Wen Chen (chengw0183@sina.com), Zi-Mei Dong (dzmhix@163.com)

**Table S1. Genetic distances for COI. Highest and lowest distance values between the two new Chinese species and congeners indicated in blue and red, respectively. Green: distance value between the two new species.**

|                          | <i>S. mediterranea</i> | <i>S. polychroa</i> | <i>R. postrema</i> | <i>D. adunca</i> | <i>D. aethiopica</i> | <i>D. afromontana</i> | <i>D. arabica</i> | <i>D. arcadia</i> | <i>D. ariadnae</i> | <i>D. benazzii</i> | <i>D. bifida</i> | <i>D. bijuga</i> | <i>D. circumcisa</i> | <i>D. constrictiva</i> | <i>D. cretica</i> | <i>D. elegans</i> | <i>D. etrusca</i> | <i>D. gemmulata</i> | <i>D. gibberosa</i> | <i>D. gonocephala</i> | <i>D. granosa</i> | <i>D. hepta</i> | <i>D. majuscula</i> | <i>D. naiadis</i> | <i>D. notogaea</i> | <i>D. pustulata</i> | <i>D. sagitta</i> | <i>D. semiglobosa</i> | <i>D. sicula</i> | <i>D. sigmoides</i> | <i>D. sinensis</i> | <i>D. subtentaculata</i> | <i>D. tumida</i> | <i>D. umbonata</i> | <i>D. verrucula</i> | <i>D. musculosa</i> | <i>D. pendula</i> |  |  |  |  |  |  |
|--------------------------|------------------------|---------------------|--------------------|------------------|----------------------|-----------------------|-------------------|-------------------|--------------------|--------------------|------------------|------------------|----------------------|------------------------|-------------------|-------------------|-------------------|---------------------|---------------------|-----------------------|-------------------|-----------------|---------------------|-------------------|--------------------|---------------------|-------------------|-----------------------|------------------|---------------------|--------------------|--------------------------|------------------|--------------------|---------------------|---------------------|-------------------|--|--|--|--|--|--|
| <i>S. mediterranea</i>   |                        |                     |                    |                  |                      |                       |                   |                   |                    |                    |                  |                  |                      |                        |                   |                   |                   |                     |                     |                       |                   |                 |                     |                   |                    |                     |                   |                       |                  |                     |                    |                          |                  |                    |                     |                     |                   |  |  |  |  |  |  |
| <i>S. polychroa</i>      | 14.90%                 |                     |                    |                  |                      |                       |                   |                   |                    |                    |                  |                  |                      |                        |                   |                   |                   |                     |                     |                       |                   |                 |                     |                   |                    |                     |                   |                       |                  |                     |                    |                          |                  |                    |                     |                     |                   |  |  |  |  |  |  |
| <i>R. postrema</i>       | 25.45%                 | 24.75%              |                    |                  |                      |                       |                   |                   |                    |                    |                  |                  |                      |                        |                   |                   |                   |                     |                     |                       |                   |                 |                     |                   |                    |                     |                   |                       |                  |                     |                    |                          |                  |                    |                     |                     |                   |  |  |  |  |  |  |
| <i>D. adunca</i>         | 37.05%                 | 35.30%              | 32.56%             |                  |                      |                       |                   |                   |                    |                    |                  |                  |                      |                        |                   |                   |                   |                     |                     |                       |                   |                 |                     |                   |                    |                     |                   |                       |                  |                     |                    |                          |                  |                    |                     |                     |                   |  |  |  |  |  |  |
| <i>D. aethiopica</i>     | 36.37%                 | 34.33%              | 36.67%             | 19.71%           |                      |                       |                   |                   |                    |                    |                  |                  |                      |                        |                   |                   |                   |                     |                     |                       |                   |                 |                     |                   |                    |                     |                   |                       |                  |                     |                    |                          |                  |                    |                     |                     |                   |  |  |  |  |  |  |
| <i>D. afromontana</i>    | 35.80%                 | 36.21%              | 37.36%             | 20.95%           | 12.18%               |                       |                   |                   |                    |                    |                  |                  |                      |                        |                   |                   |                   |                     |                     |                       |                   |                 |                     |                   |                    |                     |                   |                       |                  |                     |                    |                          |                  |                    |                     |                     |                   |  |  |  |  |  |  |
| <i>D. arabica</i>        | 36.11%                 | 34.39%              | 37.02%             | 20.08%           | 0.00%                | 12.10%                |                   |                   |                    |                    |                  |                  |                      |                        |                   |                   |                   |                     |                     |                       |                   |                 |                     |                   |                    |                     |                   |                       |                  |                     |                    |                          |                  |                    |                     |                     |                   |  |  |  |  |  |  |
| <i>D. arcadia</i>        | 34.67%                 | 30.07%              | 36.74%             | 14.67%           | 20.69%               | 20.21%                | 20.81%            |                   |                    |                    |                  |                  |                      |                        |                   |                   |                   |                     |                     |                       |                   |                 |                     |                   |                    |                     |                   |                       |                  |                     |                    |                          |                  |                    |                     |                     |                   |  |  |  |  |  |  |
| <i>D. ariadnae</i>       | 39.84%                 | 33.21%              | 39.53%             | 16.27%           | 21.96%               | 21.22%                | 22.08%            | 7.50%             |                    |                    |                  |                  |                      |                        |                   |                   |                   |                     |                     |                       |                   |                 |                     |                   |                    |                     |                   |                       |                  |                     |                    |                          |                  |                    |                     |                     |                   |  |  |  |  |  |  |
| <i>D. benazzii</i>       | 37.03%                 | 33.50%              | 37.33%             | 16.52%           | 20.94%               | 18.69%                | 20.81%            | 9.84%             | 9.81%              |                    |                  |                  |                      |                        |                   |                   |                   |                     |                     |                       |                   |                 |                     |                   |                    |                     |                   |                       |                  |                     |                    |                          |                  |                    |                     |                     |                   |  |  |  |  |  |  |
| <i>D. bifida</i>         | 35.89%                 | 33.34%              | 34.71%             | 18.19%           | 19.05%               | 17.80%                | 19.41%            | 16.30%            | 20.16%             | 16.09%             |                  |                  |                      |                        |                   |                   |                   |                     |                     |                       |                   |                 |                     |                   |                    |                     |                   |                       |                  |                     |                    |                          |                  |                    |                     |                     |                   |  |  |  |  |  |  |
| <i>D. bijuga</i>         | 40.79%                 | 36.19%              | 38.58%             | 20.62%           | 21.23%               | 21.47%                | 21.10%            | 19.93%            | 20.09%             | 18.18%             | 21.15%           |                  |                      |                        |                   |                   |                   |                     |                     |                       |                   |                 |                     |                   |                    |                     |                   |                       |                  |                     |                    |                          |                  |                    |                     |                     |                   |  |  |  |  |  |  |
| <i>D. circumcisa</i>     | 35.80%                 | 32.92%              | 36.71%             | 16.12%           | 19.97%               | 17.48%                | 20.10%            | 12.48%            | 13.79%             | 11.13%             | 17.74%           | 18.27%           |                      |                        |                   |                   |                   |                     |                     |                       |                   |                 |                     |                   |                    |                     |                   |                       |                  |                     |                    |                          |                  |                    |                     |                     |                   |  |  |  |  |  |  |
| <i>D. constrictiva</i>   | 41.76%                 | 37.11%              | 39.21%             | 20.68%           | 25.42%               | 21.82%                | 25.53%            | 16.36%            | 16.52%             | 15.66%             | 22.96%           | 23.51%           | 15.92%               |                        |                   |                   |                   |                     |                     |                       |                   |                 |                     |                   |                    |                     |                   |                       |                  |                     |                    |                          |                  |                    |                     |                     |                   |  |  |  |  |  |  |
| <i>D. cretica</i>        | 40.47%                 | 34.98%              | 37.37%             | 14.64%           | 21.95%               | 19.96%                | 22.31%            | 9.23%             | 8.96%              | 9.21%              | 18.19%           | 20.35%           | 14.99%               | 16.11%                 |                   |                   |                   |                     |                     |                       |                   |                 |                     |                   |                    |                     |                   |                       |                  |                     |                    |                          |                  |                    |                     |                     |                   |  |  |  |  |  |  |
| <i>D. elegans</i>        | 38.89%                 | 30.34%              | 37.33%             | 16.06%           | 20.69%               | 21.71%                | 20.81%            | 7.51%             | 6.07%              | 9.17%              | 17.73%           | 20.40%           | 13.81%               | 15.61%                 | 10.69%            |                   |                   |                     |                     |                       |                   |                 |                     |                   |                    |                     |                   |                       |                  |                     |                    |                          |                  |                    |                     |                     |                   |  |  |  |  |  |  |
| <i>D. etrusca</i>        | 38.06%                 | 36.89%              | 39.01%             | 18.01%           | 21.27%               | 18.50%                | 21.39%            | 11.58%            | 13.61%             | 10.96%             | 19.47%           | 21.19%           | 15.47%               | 15.86%                 | 11.86%            | 13.59%            |                   |                     |                     |                       |                   |                 |                     |                   |                    |                     |                   |                       |                  |                     |                    |                          |                  |                    |                     |                     |                   |  |  |  |  |  |  |
| <i>D. gemmulata</i>      | 37.94%                 | 34.38%              | 38.57%             | 17.22%           | 24.79%               | 20.69%                | 24.89%            | 13.31%            | 15.10%             | 14.00%             | 20.36%           | 20.14%           | 12.43%               | 17.82%                 | 14.00%            | 14.21%            | 17.26%            |                     |                     |                       |                   |                 |                     |                   |                    |                     |                   |                       |                  |                     |                    |                          |                  |                    |                     |                     |                   |  |  |  |  |  |  |
| <i>D. gibberosa</i>      | 35.58%                 | 31.22%              | 35.27%             | 19.95%           | 20.66%               | 15.61%                | 20.52%            | 15.42%            | 15.16%             | 14.21%             | 14.56%           | 20.69%           | 17.05%               | 18.49%                 | 16.56%            | 12.88%            | 17.06%            | 18.48%              |                     |                       |                   |                 |                     |                   |                    |                     |                   |                       |                  |                     |                    |                          |                  |                    |                     |                     |                   |  |  |  |  |  |  |
| <i>D. gonocephala</i>    | 38.89%                 | 34.98%              | 40.18%             | 17.22%           | 21.20%               | 20.19%                | 21.31%            | 11.14%            | 8.75%              | 9.21%              | 19.02%           | 19.62%           | 14.30%               | 16.83%                 | 10.49%            | 10.47%            | 10.97%            | 16.06%              | 16.09%              |                       |                   |                 |                     |                   |                    |                     |                   |                       |                  |                     |                    |                          |                  |                    |                     |                     |                   |  |  |  |  |  |  |
| <i>D. granosa</i>        | 35.54%                 | 33.82%              | 36.47%             | 20.01%           | 21.68%               | 15.74%                | 21.54%            | 17.82%            | 18.79%             | 16.17%             | 15.12%           | 22.54%           | 18.09%               | 20.06%                 | 17.82%            | 17.58%            | 17.63%            | 19.03%              | 11.15%              | 18.31%                |                   |                 |                     |                   |                    |                     |                   |                       |                  |                     |                    |                          |                  |                    |                     |                     |                   |  |  |  |  |  |  |
| <i>D. hepta</i>          | 38.38%                 | 34.17%              | 39.04%             | 15.78%           | 21.08%               | 19.16%                | 20.93%            | 10.02%            | 9.75%              | 3.56%              | 17.10%           | 20.22%           | 11.41%               | 16.07%                 | 10.03%            | 9.76%             | 11.21%            | 14.05%              | 13.54%              | 9.32%                 | 15.64%            |                 |                     |                   |                    |                     |                   |                       |                  |                     |                    |                          |                  |                    |                     |                     |                   |  |  |  |  |  |  |
| <i>D. majuscula</i>      | 40.51%                 | 34.42%              | 38.62%             | 17.94%           | 20.45%               | 19.19%                | 20.56%            | 13.74%            | 15.60%             | 16.08%             | 18.89%           | 22.40%           | 15.60%               | 15.66%                 | 17.02%            | 12.62%            | 16.55%            | 17.46%              | 17.25%              | 16.77%                | 19.25%            | 16.31%          |                     |                   |                    |                     |                   |                       |                  |                     |                    |                          |                  |                    |                     |                     |                   |  |  |  |  |  |  |
| <i>D. naiadis</i>        | 36.06%                 | 34.63%              | 36.37%             | 20.72%           | 13.71%               | 12.20%                | 13.86%            | 23.53%            | 24.53%             | 22.24%             | 21.60%           | 24.33%           | 20.05%               | 23.06%                 | 21.97%            | 22.21%            | 23.11%            | 24.81%              | 17.86%              | 21.71%                | 18.96%            | 21.35%          | 21.20%              |                   |                    |                     |                   |                       |                  |                     |                    |                          |                  |                    |                     |                     |                   |  |  |  |  |  |  |
| <i>D. notogaea</i>       | 36.44%                 | 29.53%              | 32.55%             | 13.32%           | 20.96%               | 19.69%                | 21.07%            | 11.97%            | 13.99%             | 13.34%             | 19.16%           | 20.84%           | 14.49%               | 18.79%                 | 15.87%            | 13.30%            | 16.08%            | 15.58%              | 17.75%              | 15.83%                | 18.53%            | 14.30%          | 13.97%              | 21.22%            |                    |                     |                   |                       |                  |                     |                    |                          |                  |                    |                     |                     |                   |  |  |  |  |  |  |
| <i>D. pustulata</i>      | 35.20%                 | 33.04%              | 32.02%             | 16.22%           | 22.08%               | 20.98%                | 21.92%            | 15.21%            | 17.97%             | 15.72%             | 19.58%           | 15.96%           | 17.08%               | 18.60%                 | 16.70%            | 15.20%            | 15.99%            | 15.21%              | 16.99%              | 16.73%                | 18.63%            | 15.37%          | 18.23%              | 22.34%            | 15.94%             |                     |                   |                       |                  |                     |                    |                          |                  |                    |                     |                     |                   |  |  |  |  |  |  |
| <i>D. sagitta</i>        | 36.44%                 | 32.62%              | 34.60%             | 13.29%           | 20.45%               | 19.94%                | 20.81%            | 7.72%             | 8.54%              | 9.18%              | 17.74%           | 19.64%           | 12.72%               | 15.63%                 | 8.12%             | 8.36%             | 12.02%            | 14.90%              | 14.00%              | 9.81%                 | 17.83%            | 8.60%           | 15.38%              | 20.71%            | 14.45%             | 13.98%              |                   |                       |                  |                     |                    |                          |                  |                    |                     |                     |                   |  |  |  |  |  |  |
| <i>D. semiglobosa</i>    | 36.71%                 | 33.50%              | 35.20%             | 16.05%           | 19.73%               | 19.46%                | 19.60%            | 12.04%            | 11.78%             | 13.56%             | 18.67%           | 18.45%           | 11.59%               | 18.69%                 | 13.80%            | 13.13%            | 15.43%            | 15.35%              | 17.56%              | 13.55%                | 19.77%            | 14.06%          | 17.27%              | 21.48%            | 14.25%             | 17.22%              | 12.67%            |                       |                  |                     |                    |                          |                  |                    |                     |                     |                   |  |  |  |  |  |  |
| <i>D. sicula</i>         | 34.34%                 | 33.50%              | 37.32%             | 20.33%           | 6.32%                | 9.85%                 | 6.28%             | 20.09%            | 22.08%             | 21.06%             | 18.67%           | 21.37%           | 19.85%               | 24.17%                 | 21.80%            | 21.09%            | 19.62%            | 23.59%              | 18.78%              | 23.86%                | 19.28%            | 20.93%          | 21.56%              | 13.84%            | 21.06%             | 21.37%              | 20.32%            | 17.43%                |                  |                     |                    |                          |                  |                    |                     |                     |                   |  |  |  |  |  |  |
| <i>D. sigmoides</i>      | 36.28%                 | 32.50%              | 36.58%             | 20.19%           | 21.37%               | 15.40%                | 21.23%            | 17.55%            | 17.76%             | 15.17%             | 15.51%           | 21.92%           | 18.03%               | 19.70%                 | 17.51%            | 15.41%            | 18.50%            | 19.22%              | 1.93%               | 18.00%                | 11.47%            | 14.83%          | 17.97%              | 18.59%            | 19.20%             | 17.78%              | 15.66%            | 18.75%                | 19.22%           |                     |                    |                          |                  |                    |                     |                     |                   |  |  |  |  |  |  |
| <i>D. sinensis</i>       | 39.51%                 | 33.52%              | 37.32%             | 16.27%           | 21.21%               | 19.19%                | 21.07%            | 12.03%            | 13.33%             | 13.36%             | 19.68%           | 18.44%           | 14.54%               | 19.29%                 | 14.26%            | 13.58%            | 17.09%            | 15.63%              | 16.81%              | 15.39%                | 19.77%            | 12.35%          | 15.62%              | 21.45%            | 15.65%             | 15.95%              | 11.34%            | 11.82%                | 19.85%           | 17.53%              |                    |                          |                  |                    |                     |                     |                   |  |  |  |  |  |  |
| <i>D. subtentaculata</i> | 38.90%                 | 33.51%              | 38.88%             | 15.35%           | 20.96%               | 20.48%                | 21.07%            | 7.52%             | 9.83%              | 8.80%              | 17.98%           | 17.24%           | 13.21%               | 16.62%                 | 9.88%             | 9.39%             | 10.32%            | 14.47%              | 15.62%              | 8.16%                 | 16.63%            | 9.59%           | 13.75%              | 23.28%            | 14.45%             | 14.73%              | 9.62%             | 13.13%                | 20.82%           | 17.30%              | 12.70%             |                          |                  |                    |                     |                     |                   |  |  |  |  |  |  |
| <i>D. tumida</i>         | 38.27%                 | 35.58%              | 37.02%             | 17.46%           | 21.69%               | 21.47%                | 21.55%            | 15.38%            | 17.49%             | 15.40%             | 21.12%           | 21.40%           | 16.35%               | 15.50%                 | 17.98%            | 14.67%            | 17.28%            | 18.48%              | 18.47%              | 18.54%                | 18.06%            | 15.81%          | 14.46%              | 24.38%            | 17.49%             | 18.24%              | 15.85%            | 17.48%                | 21.30%           | 18.93%              | 16.30%             | 16.35%                   |                  |                    |                     |                     |                   |  |  |  |  |  |  |
| <i>D. umbonata</i>       | 37.02%                 | 31.76%              | 35.82%             | 14.20%           | 21.44%               | 17.46%                | 21.56%            | 12.64%            | 12.85%             | 13.07%             | 18.18%           | 17.97%           | 9.18%                | 14.47%                 | 13.52%            | 13.99%            | 14.45%            | 10.69%              | 15.36%              | 13.97%                | 15.22%            | 13.53%          | 14.20%              | 21.23%            | 13.99%             | 14.46%              | 11.31%            | 11.10%                | 19.82%           | 15.40%              | 12.65%             | 12.86%                   | 15.14%           |                    |                     |                     |                   |  |  |  |  |  |  |
| <i>D. verrucula</i>      | 40.50%                 | 37.72%              | 42.47%             | 22.12%           | 23.00%               | 21.72%                | 22.85%            | 16.76%            | 17.49%             | 15.58%             | 21.91%           | 21.35%           | 17.03%               | 15.44%                 |                   |                   |                   |                     |                     |                       |                   |                 |                     |                   |                    |                     |                   |                       |                  |                     |                    |                          |                  |                    |                     |                     |                   |  |  |  |  |  |  |
