# Supplementary material for: Two New Species of Freshwater Planarian (Platyhelminthes, Tricladida, Dugesiidae, Dugesia) from Southern China Exhibit Unusual Karyotypes, with a Discussion on Reproduction in Aneuploid Species
Source: Hindawi journal article supplement (doi:10.1155/2024/8299436), 2024-02-22
Supplement: f3 [file 8299436.f3.pdf]

# Two new species of freshwater planarian (Platyhelminthes, Tricladida, DugesIIDae, *Dugesia*) from Southern China exhibit unusual karyotypes, with a discussion on reproduction in aneuploid species

Lei Wang<sup>A</sup>, Shi-Qing Zhu<sup>A</sup>, Fu-Hao Ma<sup>A</sup>, Xiang-Jun Li<sup>A</sup>, Yu-Hao Zhao<sup>A</sup>, Xin-Xin Sun<sup>A</sup>, Ning Li<sup>A</sup>, Ronald Sluys<sup>B</sup>, De-Zeng Liu<sup>A</sup>, Zi-Mei Dong<sup>A\*</sup>, Guang-Wen Chen<sup>A\*</sup>

<sup>A</sup>College of Life Science, Henan Normal University, Xixiang, 453007 Henan, China

<sup>B</sup>Naturalis Biodiversity Center, Leiden, The Netherlands

\* Corresponding author: Guang-Wen Chen (chengw0183@sina.com), Zi-Mei Dong (dzmhix@163.com)

**Table S2. Genetic distances for ITS-1. Highest and lowest distance values between the two new Chinese species and congeners indicated in blue and red, respectively. Green: distance value between the two new species.**

|                          | <i>S. mediterranea</i> | <i>D. adunca</i> | <i>D. aethiopica</i> | <i>D. afromontana</i> | <i>D. arabica</i> | <i>D. arcadia</i> | <i>D. ariadnae</i> | <i>D. batuensis</i> | <i>D. benazzii</i> | <i>D. bengalensis</i> | <i>D. bifida</i> | <i>D. circumcisa</i> | <i>D. cretica</i> | <i>D. constrictiva</i> | <i>D. deharvengi</i> | <i>D. elegans</i> | <i>D. etrusca</i> | <i>D. hepta</i> | <i>D. gibberosa</i> | <i>D. gonocephala</i> | <i>D. granosa</i> | <i>D. japonica</i> | <i>D. liguriensis</i> | <i>D. majuscula</i> | <i>D. naiadis</i> | <i>D. notogaea</i> | <i>D. pustulata</i> | <i>D. ryukyensis</i> | <i>D. sagitta</i> | <i>D. semiglobosa</i> | <i>D. sigmoides</i> | <i>D. sicula</i> | <i>D. subtentaculata</i> | <i>D. tumida</i> | <i>D. umbonata</i> | <i>D. verrucula</i> | <i>D. musculosa</i> | <i>D. pendula</i> |  |  |  |  |  |  |
|--------------------------|------------------------|------------------|----------------------|-----------------------|-------------------|-------------------|--------------------|---------------------|--------------------|-----------------------|------------------|----------------------|-------------------|------------------------|----------------------|-------------------|-------------------|-----------------|---------------------|-----------------------|-------------------|--------------------|-----------------------|---------------------|-------------------|--------------------|---------------------|----------------------|-------------------|-----------------------|---------------------|------------------|--------------------------|------------------|--------------------|---------------------|---------------------|-------------------|--|--|--|--|--|--|
| <i>S. mediterranea</i>   |                        |                  |                      |                       |                   |                   |                    |                     |                    |                       |                  |                      |                   |                        |                      |                   |                   |                 |                     |                       |                   |                    |                       |                     |                   |                    |                     |                      |                   |                       |                     |                  |                          |                  |                    |                     |                     |                   |  |  |  |  |  |  |
| <i>D. adunca</i>         | 51.28%                 |                  |                      |                       |                   |                   |                    |                     |                    |                       |                  |                      |                   |                        |                      |                   |                   |                 |                     |                       |                   |                    |                       |                     |                   |                    |                     |                      |                   |                       |                     |                  |                          |                  |                    |                     |                     |                   |  |  |  |  |  |  |
| <i>D. aethiopica</i>     | 45.27%                 | 19.43%           |                      |                       |                   |                   |                    |                     |                    |                       |                  |                      |                   |                        |                      |                   |                   |                 |                     |                       |                   |                    |                       |                     |                   |                    |                     |                      |                   |                       |                     |                  |                          |                  |                    |                     |                     |                   |  |  |  |  |  |  |
| <i>D. afromontana</i>    | 47.77%                 | 19.85%           | 2.92%                |                       |                   |                   |                    |                     |                    |                       |                  |                      |                   |                        |                      |                   |                   |                 |                     |                       |                   |                    |                       |                     |                   |                    |                     |                      |                   |                       |                     |                  |                          |                  |                    |                     |                     |                   |  |  |  |  |  |  |
| <i>D. arabica</i>        | 45.27%                 | 19.43%           | 0.00%                | 2.92%                 |                   |                   |                    |                     |                    |                       |                  |                      |                   |                        |                      |                   |                   |                 |                     |                       |                   |                    |                       |                     |                   |                    |                     |                      |                   |                       |                     |                  |                          |                  |                    |                     |                     |                   |  |  |  |  |  |  |
| <i>D. arcadia</i>        | 49.05%                 | 15.35%           | 15.27%               | 16.39%                | 15.27%            |                   |                    |                     |                    |                       |                  |                      |                   |                        |                      |                   |                   |                 |                     |                       |                   |                    |                       |                     |                   |                    |                     |                      |                   |                       |                     |                  |                          |                  |                    |                     |                     |                   |  |  |  |  |  |  |
| <i>D. ariadnae</i>       | 48.58%                 | 15.59%           | 16.51%               | 17.15%                | 16.51%            | 2.06%             |                    |                     |                    |                       |                  |                      |                   |                        |                      |                   |                   |                 |                     |                       |                   |                    |                       |                     |                   |                    |                     |                      |                   |                       |                     |                  |                          |                  |                    |                     |                     |                   |  |  |  |  |  |  |
| <i>D. batuensis</i>      | 51.41%                 | 7.72%            | 19.40%               | 19.29%                | 19.40%            | 14.58%            | 13.83%             |                     |                    |                       |                  |                      |                   |                        |                      |                   |                   |                 |                     |                       |                   |                    |                       |                     |                   |                    |                     |                      |                   |                       |                     |                  |                          |                  |                    |                     |                     |                   |  |  |  |  |  |  |
| <i>D. benazzii</i>       | 48.50%                 | 12.46%           | 16.89%               | 17.52%                | 16.89%            | 8.21%             | 7.97%              | 12.68%              |                    |                       |                  |                      |                   |                        |                      |                   |                   |                 |                     |                       |                   |                    |                       |                     |                   |                    |                     |                      |                   |                       |                     |                  |                          |                  |                    |                     |                     |                   |  |  |  |  |  |  |
| <i>D. bengalensis</i>    | 50.51%                 | 5.95%            | 19.23%               | 19.39%                | 19.23%            | 15.15%            | 15.63%             | 9.61%               | 14.49%             |                       |                  |                      |                   |                        |                      |                   |                   |                 |                     |                       |                   |                    |                       |                     |                   |                    |                     |                      |                   |                       |                     |                  |                          |                  |                    |                     |                     |                   |  |  |  |  |  |  |
| <i>D. bifida</i>         | 46.08%                 | 18.24%           | 11.70%               | 13.50%                | 11.70%            | 17.41%            | 18.18%             | 19.54%              | 15.50%             | 18.59%                |                  |                      |                   |                        |                      |                   |                   |                 |                     |                       |                   |                    |                       |                     |                   |                    |                     |                      |                   |                       |                     |                  |                          |                  |                    |                     |                     |                   |  |  |  |  |  |  |
| <i>D. circumcisa</i>     | 50.33%                 | 10.96%           | 16.06%               | 18.01%                | 16.06%            | 11.66%            | 11.41%             | 11.44%              | 10.09%             | 12.72%                | 15.17%           |                      |                   |                        |                      |                   |                   |                 |                     |                       |                   |                    |                       |                     |                   |                    |                     |                      |                   |                       |                     |                  |                          |                  |                    |                     |                     |                   |  |  |  |  |  |  |
| <i>D. cretica</i>        | 49.32%                 | 15.10%           | 15.79%               | 15.15%                | 15.79%            | 5.48%             | 5.26%              | 13.61%              | 8.19%              | 15.16%                | 17.18%           | 11.19%               |                   |                        |                      |                   |                   |                 |                     |                       |                   |                    |                       |                     |                   |                    |                     |                      |                   |                       |                     |                  |                          |                  |                    |                     |                     |                   |  |  |  |  |  |  |
| <i>D. constrictiva</i>   | 49.71%                 | 12.64%           | 14.78%               | 15.40%                | 14.78%            | 12.64%            | 11.91%             | 11.21%              | 11.74%             | 13.94%                | 15.13%           | 7.06%                | 11.44%            |                        |                      |                   |                   |                 |                     |                       |                   |                    |                       |                     |                   |                    |                     |                      |                   |                       |                     |                  |                          |                  |                    |                     |                     |                   |  |  |  |  |  |  |
| <i>D. deharvengi</i>     | 54.76%                 | 12.72%           | 18.63%               | 19.03%                | 18.63%            | 15.62%            | 16.38%             | 11.52%              | 15.50%             | 14.02%                | 17.97%           | 11.69%               | 15.89%            | 12.37%                 |                      |                   |                   |                 |                     |                       |                   |                    |                       |                     |                   |                    |                     |                      |                   |                       |                     |                  |                          |                  |                    |                     |                     |                   |  |  |  |  |  |  |
| <i>D. elegans</i>        | 49.88%                 | 15.61%           | 16.52%               | 17.14%                | 16.52%            | 2.48%             | 1.64%              | 14.33%              | 7.52%              | 15.39%                | 17.94%           | 11.90%               | 5.70%             | 12.39%                 | 16.14%               |                   |                   |                 |                     |                       |                   |                    |                       |                     |                   |                    |                     |                      |                   |                       |                     |                  |                          |                  |                    |                     |                     |                   |  |  |  |  |  |  |
| <i>D. etrusca</i>        | 48.95%                 | 16.79%           | 18.38%               | 19.61%                | 18.38%            | 8.63%             | 9.57%              | 15.97%              | 8.25%              | 15.75%                | 18.80%           | 12.00%               | 9.34%             | 12.75%                 | 16.75%               | 9.33%             |                   |                 |                     |                       |                   |                    |                       |                     |                   |                    |                     |                      |                   |                       |                     |                  |                          |                  |                    |                     |                     |                   |  |  |  |  |  |  |
| <i>D. hepta</i>          | 47.33%                 | 12.65%           | 16.54%               | 17.17%                | 16.54%            | 8.41%             | 7.94%              | 12.38%              | 0.41%              | 14.68%                | 15.67%           | 10.29%               | 8.16%             | 11.93%                 | 15.69%               | 7.48%             | 8.22%             |                 |                     |                       |                   |                    |                       |                     |                   |                    |                     |                      |                   |                       |                     |                  |                          |                  |                    |                     |                     |                   |  |  |  |  |  |  |
| <i>D. gibberosa</i>      | 46.25%                 | 18.20%           | 13.10%               | 13.68%                | 13.10%            | 16.11%            | 17.39%             | 19.48%              | 17.01%             | 17.74%                | 8.93%            | 17.43%               | 17.67%            | 16.09%                 | 18.99%               | 17.67%            | 19.82%            | 16.65%          |                     |                       |                   |                    |                       |                     |                   |                    |                     |                      |                   |                       |                     |                  |                          |                  |                    |                     |                     |                   |  |  |  |  |  |  |
| <i>D. gonocephala</i>    | 48.42%                 | 13.72%           | 16.06%               | 16.70%                | 16.06%            | 7.04%             | 7.04%              | 12.92%              | 4.44%              | 14.22%                | 13.43%           | 9.38%                | 6.37%             | 10.54%                 | 14.68%               | 7.04%             | 5.73%             | 4.42%           | 16.69%              |                       |                   |                    |                       |                     |                   |                    |                     |                      |                   |                       |                     |                  |                          |                  |                    |                     |                     |                   |  |  |  |  |  |  |
| <i>D. granosa</i>        | 48.50%                 | 17.67%           | 14.09%               | 15.45%                | 14.09%            | 16.57%            | 17.59%             | 20.00%              | 15.70%             | 18.80%                | 8.69%            | 14.88%               | 17.37%            | 16.85%                 | 18.69%               | 17.86%            | 18.23%            | 15.63%          | 5.93%               | 15.38%                |                   |                    |                       |                     |                   |                    |                     |                      |                   |                       |                     |                  |                          |                  |                    |                     |                     |                   |  |  |  |  |  |  |
| <i>D. japonica</i>       | 49.00%                 | 12.42%           | 14.81%               | 15.43%                | 14.81%            | 10.72%            | 10.95%             | 10.76%              | 9.86%              | 12.49%                | 14.70%           | 8.44%                | 10.26%            | 6.60%                  | 10.97%               | 10.94%            | 10.81%            | 10.06%          | 16.14%              | 9.39%                 | 15.90%            |                    |                       |                     |                   |                    |                     |                      |                   |                       |                     |                  |                          |                  |                    |                     |                     |                   |  |  |  |  |  |  |
| <i>D. liguriensis</i>    | 49.99%                 | 16.69%           | 17.56%               | 18.76%                | 17.56%            | 9.06%             | 10.48%             | 15.63%              | 8.68%              | 16.20%                | 18.21%           | 11.69%               | 9.54%             | 13.17%                 | 16.93%               | 10.23%            | 2.48%             | 8.87%           | 20.30%              | 5.72%                 | 18.96%            | 11.95%             |                       |                     |                   |                    |                     |                      |                   |                       |                     |                  |                          |                  |                    |                     |                     |                   |  |  |  |  |  |  |
| <i>D. majuscula</i>      | 46.79%                 | 11.42%           | 13.78%               | 14.64%                | 13.78%            | 11.41%            | 10.69%             | 10.96%              | 11.02%             | 12.21%                | 14.13%           | 5.07%                | 10.95%            | 3.96%                  | 10.24%               | 11.65%            | 11.75%            | 11.21%          | 15.56%              | 10.07%                | 15.33%            | 5.94%              | 11.93%                |                     |                   |                    |                     |                      |                   |                       |                     |                  |                          |                  |                    |                     |                     |                   |  |  |  |  |  |  |
| <i>D. naiadis</i>        | 46.46%                 | 22.10%           | 4.39%                | 4.41%                 | 4.39%             | 16.76%            | 17.77%             | 20.99%              | 19.21%             | 21.92%                | 14.13%           | 19.14%               | 16.80%            | 16.27%                 | 21.00%               | 17.78%            | 20.22%            | 18.84%          | 14.55%              | 18.35%                | 16.58%            | 16.81%             | 18.85%                | 16.25%              |                   |                    |                     |                      |                   |                       |                     |                  |                          |                  |                    |                     |                     |                   |  |  |  |  |  |  |
| <i>D. notogaea</i>       | 51.89%                 | 6.80%            | 20.16%               | 20.59%                | 20.16%            | 16.06%            | 16.55%             | 10.03%              | 15.65%             | 1.03%                 | 19.26%           | 13.62%               | 16.34%            | 14.85%                 | 14.68%               | 16.06%            | 16.93%            | 15.84%          | 18.67%              | 15.12%                | 20.01%            | 13.63%             | 17.37%                | 13.09%              | 22.60%            |                    |                     |                      |                   |                       |                     |                  |                          |                  |                    |                     |                     |                   |  |  |  |  |  |  |
| <i>D. pustulata</i>      | 49.97%                 | 19.28%           | 19.24%               | 19.66%                | 19.24%            | 20.63%            | 20.36%             | 19.00%              | 20.04%             | 21.26%                | 19.95%           | 18.01%               | 17.99%            | 19.61%                 | 20.94%               | 21.19%            | 20.80%            | 19.91%          | 18.53%              | 20.24%                | 19.34%            | 20.18%             | 19.89%                | 17.96%              | 20.58%            | 22.22%             |                     |                      |                   |                       |                     |                  |                          |                  |                    |                     |                     |                   |  |  |  |  |  |  |
| <i>D. ryukyensis</i>     | 51.61%                 | 8.41%            | 21.08%               | 20.99%                | 21.08%            | 14.61%            | 14.37%             | 2.29%               | 12.71%             | 9.39%                 | 20.97%           | 12.19%               | 14.14%            | 12.71%                 | 13.02%               | 14.36%            | 15.98%            | 12.41%          | 20.35%              | 13.45%                | 20.88%            | 11.27%             | 16.69%                | 12.45%              | 22.71%            | 9.80%              | 19.88%              |                      |                   |                       |                     |                  |                          |                  |                    |                     |                     |                   |  |  |  |  |  |  |
| <i>D. sagitta</i>        | 50.40%                 | 14.86%           | 15.52%               | 16.65%                | 15.52%            | 0.82%             | 2.06%              | 14.09%              | 7.76%              | 15.15%                | 17.68%           | 11.19%               | 5.26%             | 12.17%                 | 15.12%               | 2.06%             | 8.87%             | 7.96%           | 16.63%              | 6.59%                 | 17.09%            | 10.72%             | 9.30%                 | 11.18%              | 17.01%            | 16.06%             | 20.38%              | 14.13%               |                   |                       |                     |                  |                          |                  |                    |                     |                     |                   |  |  |  |  |  |  |
| <i>D. semiglobosa</i>    | 47.50%                 | 14.57%           | 17.53%               | 18.17%                | 17.53%            | 14.05%            | 14.05%             | 13.83%              | 12.92%             | 15.90%                | 17.14%           | 6.15%                | 13.34%            | 9.06%                  | 11.65%               | 14.80%            | 13.67%            | 13.11%          | 18.61%              | 12.65%                | 17.08%            | 9.56%              | 14.34%                | 6.15%               | 20.13%            | 16.81%             | 20.12%              | 14.62%               | 13.56%            |                       |                     |                  |                          |                  |                    |                     |                     |                   |  |  |  |  |  |  |
| <i>D. sigmoides</i>      | 47.31%                 | 18.70%           | 13.06%               | 14.14%                | 13.06%            | 16.83%            | 18.12%             | 19.96%              | 16.97%             | 17.94%                | 8.69%            | 17.65%               | 18.14%            | 16.55%                 | 20.01%               | 17.86%            | 19.23%            | 16.61%          | 1.23%               | 16.65%                | 5.93%             | 15.82%             | 19.70%                | 16.02%              | 15.02%            | 19.14%             | 18.75%              | 20.83%               | 17.63%            | 19.37%                |                     |                  |                          |                  |                    |                     |                     |                   |  |  |  |  |  |  |
| <i>D. sicula</i>         | 46.06%                 | 19.95%           | 0.41%                | 3.35%                 | 0.41%             | 15.76%            | 17.01%             | 19.92%              | 17.39%             | 19.76%                | 12.18%           | 16.56%               | 16.05%            | 15.27%                 | 19.15%               | 17.02%            | 18.38%            | 17.04%          | 13.59%              | 16.56%                | 14.57%            | 14.81%             | 17.05%                | 14.27%              | 3.96%             | 20.69%             | 19.77%              | 21.62%               | 16.02%            | 18.04%                | 13.54%              |                  |                          |                  |                    |                     |                     |                   |  |  |  |  |  |  |
| <i>D. subtentaculata</i> | 49.88%                 | 13.39%           | 15.51%               | 15.62%                | 15.51%            | 7.25%             | 7.26%              | 13.11%              | 5.96%              | 14.41%                | 14.88%           | 10.98%               | 8.16%             | 12.42%                 | 14.87%               | 7.25%             | 8.44%             | 5.94%           | 14.84%              | 5.07%                 | 14.81%            | 11.24%             | 8.18%                 | 10.72%              | 17.52%            | 15.31%             | 19.06%              | 13.64%               | 7.04%             | 14.57%                | 14.81%              | 16.00%           |                          |                  |                    |                     |                     |                   |  |  |  |  |  |  |
| <i>D. tumida</i>         | 47.68%                 | 10.96%           | 13.29%               | 14.64%                | 13.29%            | 10.94%            | 10.23%             | 10.49%              | 11.02%             | 11.73%                | 13.63%           | 5.29%                | 10.48%            | 3.97%                  | 11.44%               | 11.18%            | 11.75%            | 11.21%          | 15.33%              | 10.07%                | 14.82%            | 5.72%              | 11.93%                | 1.85%               | 16.25%            | 12.62%             | 17.72%              | 11.97%               | 10.72%            | 7.26%                 | 15.27%              | 13.77%           | 10.24%                   |                  |                    |                     |                     |                   |  |  |  |  |  |  |
| <i>D. umbonata</i>       | 50.77%                 | 12.66%           | 15.84%               | 16.22%                | 15.84%            | 14.63%            | 13.63%             | 13.16%              | 12.54%             | 12.97%                | 14.22%           |                      |                   |                        |                      |                   |                   |                 |                     |                       |                   |                    |                       |                     |                   |                    |                     |                      |                   |                       |                     |                  |                          |                  |                    |                     |                     |                   |  |  |  |  |  |  |
